# Supplementary material for: A dispersion-corrected DFT study on adsorption of battery active materials anthraquinone and its derivatives on monolayer graphene and h-BN
Source: Royal Society of Chemistry journal article supplement (doi:10.1039/c4ta00103f), 2014-01-01
Supplement: c4ta00103f1.pdf [file c4ta00103f1.pdf]

Supporting information for

**“A dispersion-corrected DFT study on  
adsorption of battery active materials  
anthraquinone and its derivatives on  
monolayer graphene and *h*-BN”**

Yang-Xin Yu\*

*Laboratory of Chemical Engineering Thermodynamics, Department of  
Chemical Engineering, Tsinghua University, Beijing 100084, P. R. China*

E-mail: yangxyu@mail.tsinghua.edu.cn

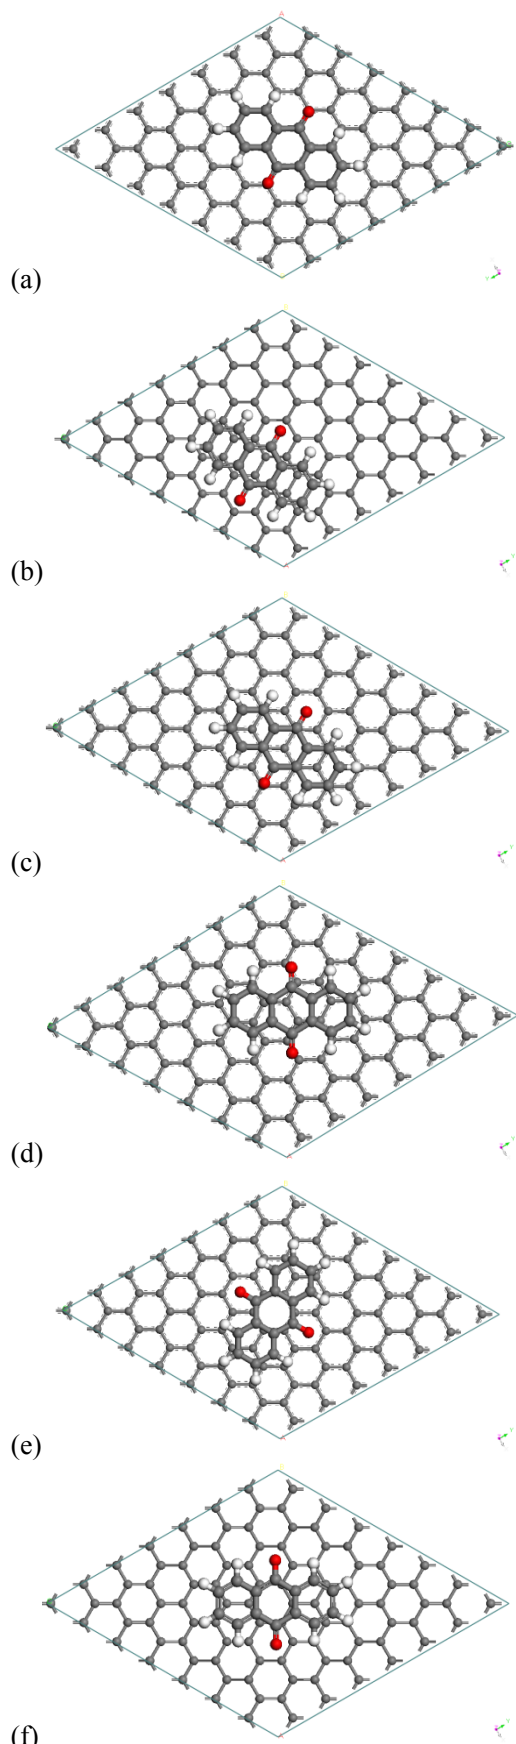

**Figure S1.** Equilibrium geometries of an AQ molecule on different adsorption sites of a graphene nanosheet: (a) AA, (b) BP, (c) AB, (d) BS, (e) Cross and (f) SC.

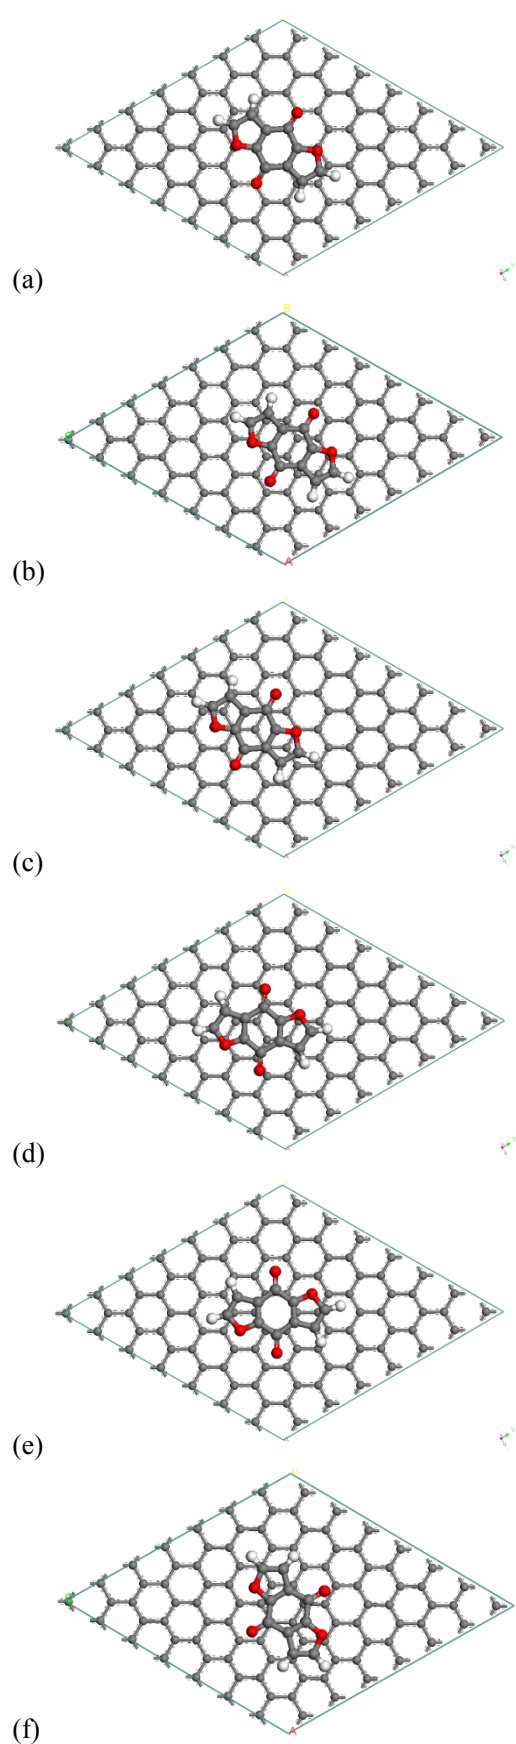

**Figure S2.** Equilibrium geometries of a BFFD molecule adsorbed on different adsorption sites of a graphene nanosheet: (a) AA, (b) BP, (c) AB, (d) BS, (e) Cross and (f) SC.

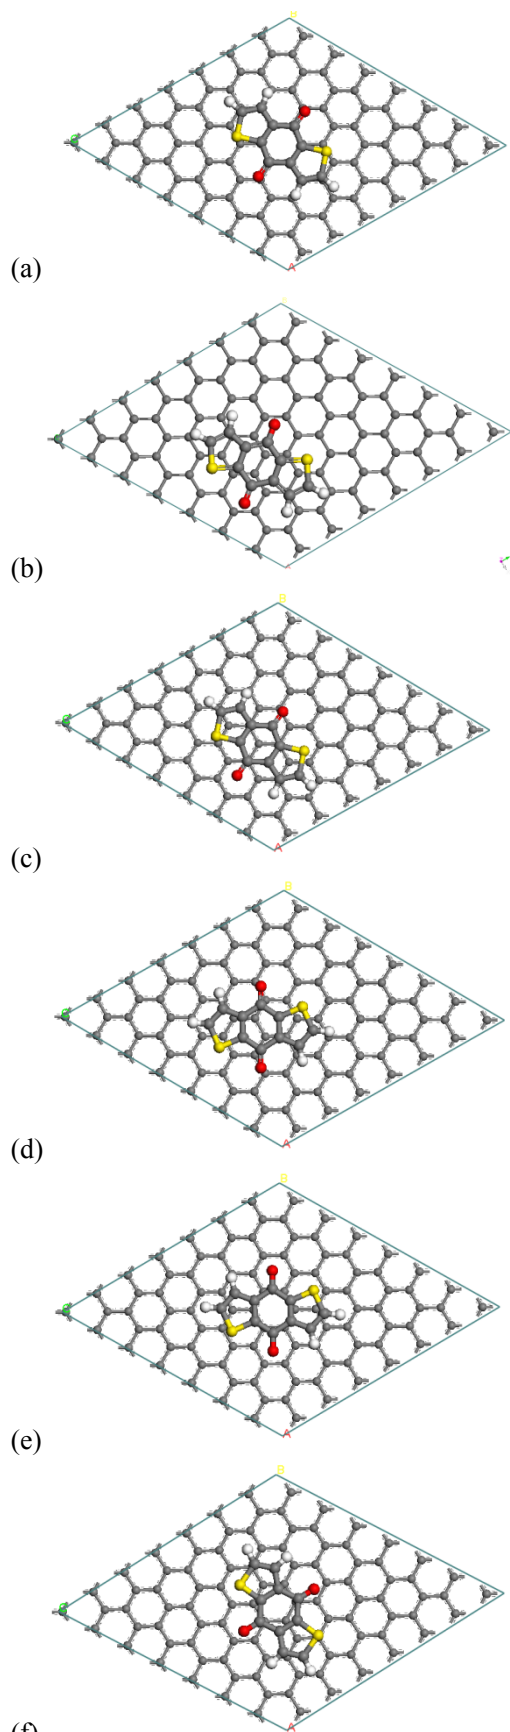

(f)  
**Figure S3.** Equilibrium geometries of a BDTD molecule adsorbed on different sites of a graphene nanosheet: (a) AA, (b) BP, (c) AB, (d) BS, (e) Cross and (f) SC.

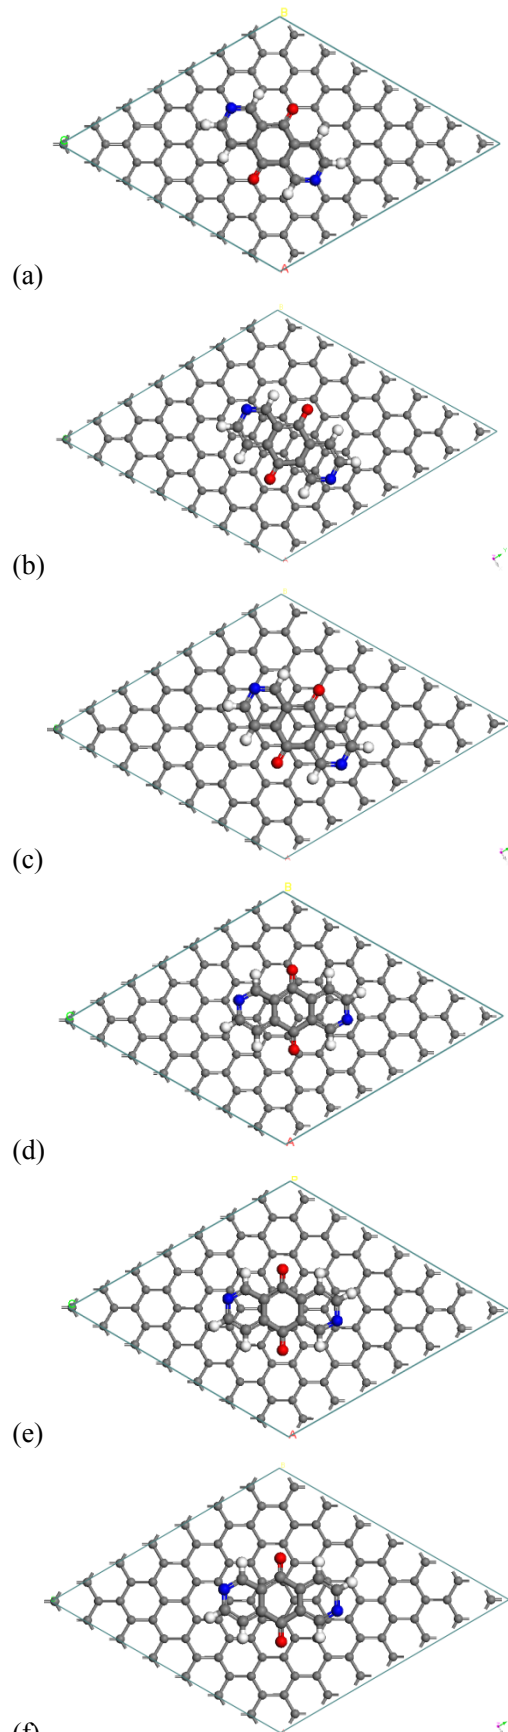

(f)  
**Figure S4.** Equilibrium geometries of a PID molecule adsorbed on different adsorption sites of a graphene nanosheet: (a) AA, (b) BP, (c) AB, (d) BS, (e) Cross and (f) SC.

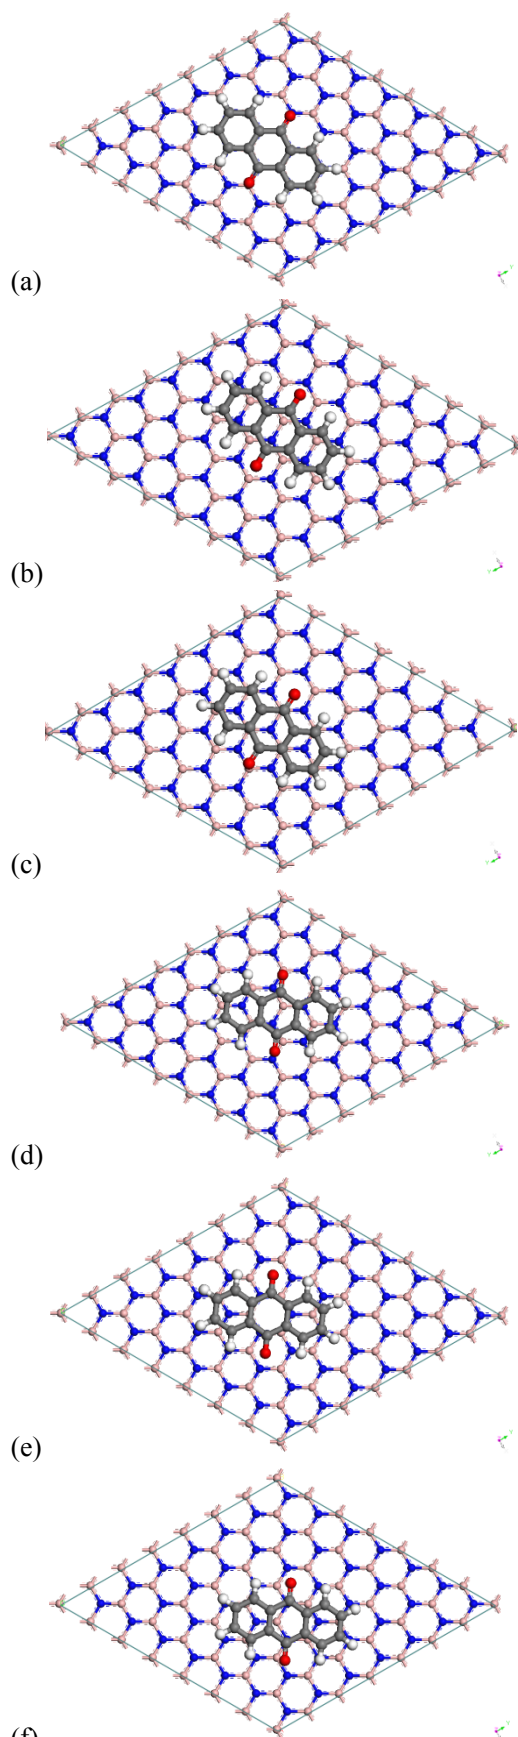

**Figure S5.** Equilibrium geometries of an AQ molecule adsorbed on different adsorption sites of a BN nanosheet: (a) AA, (b) BP, (c) AB, (d) BS, (e) Cross and (f) SC.

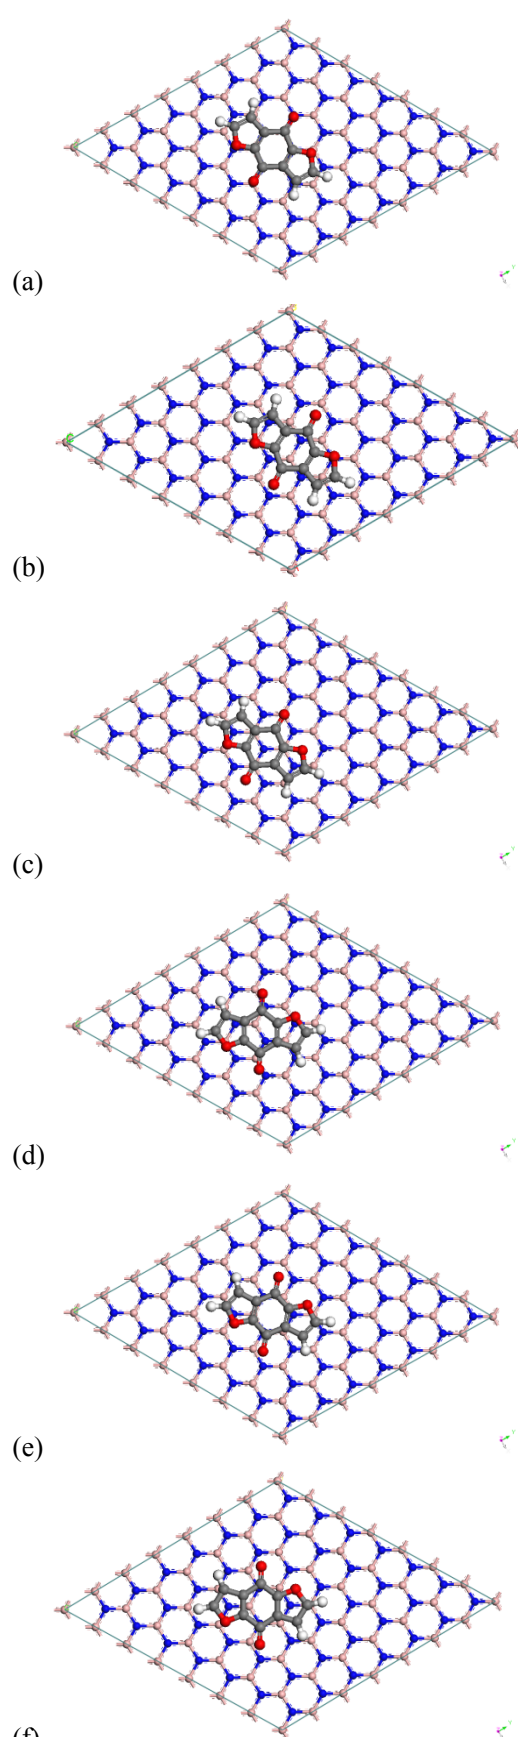

**Figure S6.** Equilibrium geometries of a BFFD molecule adsorbed on different adsorption sites of a BN nanosheet: (a) AA, (b) BP, (c) AB, (d) BS, (e) Cross and (f) SC.

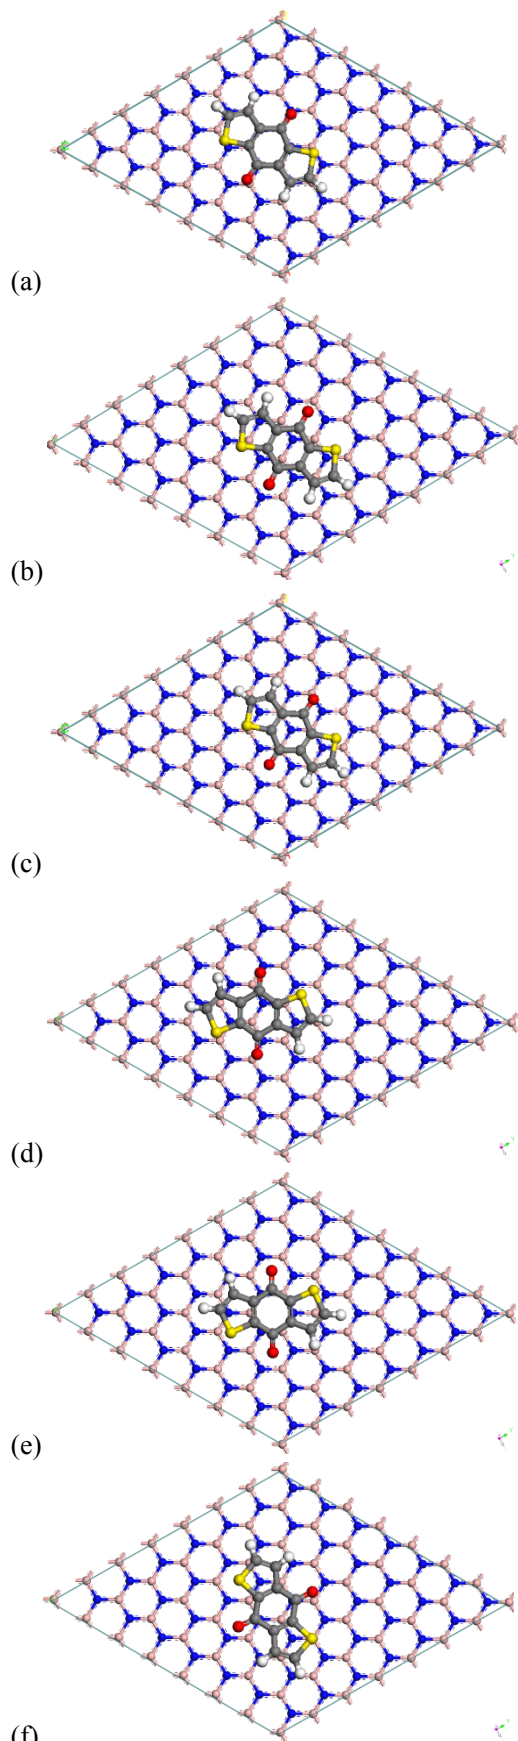

**Figure S7.** Equilibrium geometries of a BDTD molecule adsorbed on different adsorption sites of a BN nanosheet: (a) AA, (b) BP, (c) AB, (d) BS, (e) Cross and (f) SC.

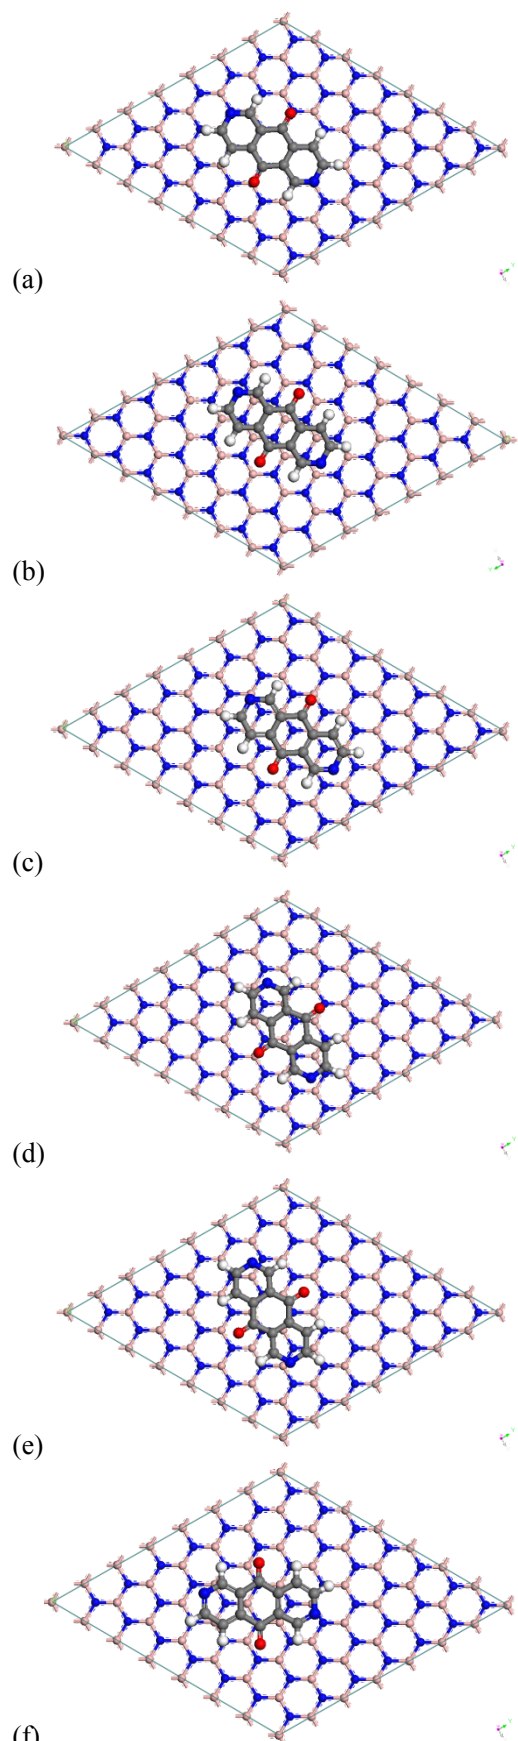

**Figure S8.** Equilibrium geometries of a PID molecule adsorbed on different adsorption sites of a BN nanosheet: (a) AA, (b) BP, (c) AB, (d) BS, (e) Cross and (f) SC.
